# Supplementary material for: Troponin T Mutation as a Cause of Left Ventricular Systolic Dysfunction in a Young Patient with Previous Surgical Correction of Aortic Coarctation
Source: MDPI journal article supplement (doi:10.3390/biom11050696), 2021-05-06
Supplement: s1 [file s1]

**Supplementary Table 1.** List of the 325 genes included in the NGS panel.

| <b>Gene</b> | <b>Read Depth</b> | <b>Mean Coverage</b> |
|-------------|-------------------|----------------------|
| A2ML1       | 333.29            | 96.77                |
| ABCA1       | 304.22            | 97.83                |
| ABCB1       | 295.88            | 95.83                |
| ABCC9       | 272.36            | 97.44                |
| ABCG5       | 383.73            | 100                  |
| ABCG8       | 346.5             | 100                  |
| ACE         | 330.74            | 100                  |
| ACTA2       | 269.88            | 100                  |
| ACTC1       | 414.6             | 100                  |
| ACTN2       | 230.54            | 100                  |
| ADAMTS10    | 459.57            | 92.86                |
| ADAMTS9     | 300.97            | 100                  |
| ADAMTSL4    | 1362              | 80                   |
| ADCY5       | 313.91            | 91.3                 |
| ADD1        | 348.93            | 100                  |
| ADRA2A      | 660               | 100                  |
| ADRB1       | 394.33            | 100                  |
| ADRB2       | 1313              | 100                  |
| AGT         | 562.5             | 100                  |
| AGTR1       | 1288              | 100                  |
| AKAP9       | 388.61            | 90.2                 |
| ANK1        | 299.86            | 97.62                |
| ANK2        | 422.7             | 82.61                |
| ANKRD1      | 303.86            | 100                  |
| APOA1       | 684.5             | 100                  |
| APOA2       | 271.67            | 100                  |
| APOA5       | 816               | 100                  |
| APOB        | 675.52            | 96                   |
| APOC2       | 185.33            | 100                  |
| APOC3       | 387.5             | 100                  |
| APOE        | 365.25            | 100                  |
| APP         | 255               | 94.44                |
| ARHGAP31    | 461.62            | 92.31                |
| ARL6        | 282.86            | 85.71                |
| ATP11A      | 279.03            | 96.55                |
| B2M         | 226               | 100                  |
| B3GAT3      | 472.5             | 100                  |
| BAG3        | 563.5             | 100                  |
| BBIP1       | 232.5             | 100                  |
| BBS1        | 318.29            | 92.86                |
| BBS10       | 1271.5            | 100                  |
| BBS12       | 2253              | 100                  |
| BBS2        | 346.33            | 93.33                |

|          |        |       |
|----------|--------|-------|
| BBS4     | 246.4  | 100   |
| BBS5     | 287    | 80    |
| BBS7     | 284    | 94.12 |
| BBS9     | 270.1  | 95.24 |
| BCL11A   | 808    | 75    |
| BRAF     | 254.94 | 88.89 |
| C2CD4B   | 352    | 100   |
| C8orf37  | 256.33 | 83.33 |
| CACNA1C  | 298.44 | 100   |
| CACNA2D1 | 234.39 | 81.58 |
| CACNB2   | 283.47 | 94.74 |
| CALM1    | 311    | 100   |
| CALM2    | 278.33 | 100   |
| CAMK1D   | 269.55 | 90.91 |
| CASQ2    | 263.73 | 81.82 |
| CAV3     | 364    | 100   |
| CBS      | 306.31 | 100   |
| CCDC115  | 303    | 100   |
| CCND1    | 306.8  | 100   |
| CDC123   | 222.15 | 92.31 |
| CDKAL1   | 274    | 93.33 |
| CDKN2A   | 316.2  | 100   |
| CDKN2B   | 393.5  | 100   |
| CEP290   | 282.36 | 96    |
| CETP     | 343    | 61.54 |
| CHD7     | 415.94 | 97.06 |
| CITED2   | 1232   | 100   |
| CLCNKB   | 325.6  | 93.33 |
| COL1A2   | 289.03 | 91.89 |
| COL3A1   | 355.29 | 79.41 |
| CREB3L3  | 423.75 | 100   |
| CRY2     | 315    | 100   |
| CRYAB    | 445    | 100   |
| CSRP3    | 277.2  | 100   |
| CST3     | 230.67 | 100   |
| CTNNA3   | 248    | 100   |
| CUL3     | 275.19 | 93.75 |
| CYP11B1  | 555.17 | 100   |
| CYP11B2  | 495.57 | 100   |
| CYP27A1  | 521.8  | 100   |
| CYP2C19  | 364    | 100   |
| CYP2C9   | 364.5  | 100   |
| CYP2D6   | 487.83 | 100   |
| CYP3A4   | 300.77 | 100   |
| CYP7A1   | 379.67 | 100   |
| DES      | 551.4  | 100   |

|          |        |       |
|----------|--------|-------|
| DGKB     | 258.83 | 91.67 |
| DHCR7    | 355.71 | 100   |
| DLL4     | 365.22 | 100   |
| DMD      | 249.83 | 100   |
| DOCK6    | 392.73 | 93.94 |
| DOLK     | 1731   | 100   |
| DSC2     | 340.13 | 93.33 |
| DSG2     | 412.92 | 100   |
| DSP      | 517.92 | 100   |
| DTNA     | 282.28 | 88    |
| DUSP9    | 369    | 100   |
| DYNC2LI1 | 231.08 | 100   |
| ELN      | 363.46 | 84.62 |
| EOGT     | 216.79 | 100   |
| ESR1     | 357.62 | 100   |
| EVC      | 342.25 | 100   |
| EVC2     | 324.68 | 95.45 |
| F2       | 395.4  | 100   |
| F5       | 383.16 | 100   |
| F8       | 424.81 | 92.59 |
| FADS1    | 357.89 | 100   |
| FBN1     | 298.53 | 98.33 |
| FBN2     | 262.77 | 95.31 |
| FGA      | 572.33 | 100   |
| FGB      | 388.43 | 100   |
| FGG      | 363.75 | 87.5  |
| FHL2     | 333.2  | 100   |
| FKTN     | 274.22 | 100   |
| FLNC     | 541.96 | 100   |
| FN3K     | 324.67 | 100   |
| FOXE3    | 282    | 100   |
| FTO      | 312.44 | 88.89 |
| G6PC2    | 327.6  | 100   |
| GATA4    | 298.67 | 83.33 |
| GATA5    | 343.67 | 100   |
| GATA6    | 371.83 | 100   |
| GATAD1   | 247.2  | 100   |
| GCK      | 369.8  | 90    |
| GCKR     | 278.75 | 87.5  |
| GDF1     | 252.25 | 100   |
| GIPR     | 298    | 100   |
| GJA5     | 1330   | 100   |
| GLI1     | 417.56 | 100   |
| GLIS3    | 417.45 | 100   |
| GNAS     | 667.8  | 100   |
| GPD1L    | 284.12 | 87.5  |

|         |         |       |
|---------|---------|-------|
| GPIHBP1 | 409.33  | 100   |
| GSN     | 287.79  | 94.74 |
| HCN4    | 666.71  | 100   |
| HFE     | 428.6   | 100   |
| HHEX    | 402     | 100   |
| HK1     | 301.68  | 90.91 |
| HMGA2   | 214     | 100   |
| HMGCR   | 362.07  | 100   |
| HNF1A   | 515     | 87.5  |
| HNF1B   | 276.67  | 100   |
| HRAS    | 446.33  | 100   |
| IDE     | 244.33  | 96.3  |
| IFT172  | 305.32  | 100   |
| IFT27   | 289.29  | 100   |
| IGF1    | 266.67  | 83.33 |
| IGF2BP2 | 257.06  | 100   |
| IL1B    | 279.33  | 83.33 |
| IL1RN   | 247.17  | 83.33 |
| INS     | 361     | 100   |
| INSR    | 379.05  | 100   |
| ITGB3   | 294.14  | 85.71 |
| ITM2B   | 284.33  | 83.33 |
| JAG1    | 380     | 95.24 |
| JAZF1   | 336.8   | 100   |
| JPH2    | 432.71  | 100   |
| JUP     | 396.25  | 100   |
| KAT6B   | 520.25  | 93.75 |
| KCNA5   | 1955    | 0     |
| KCND3   | 430.14  | 100   |
| KCNE1   | 615     | 100   |
| KCNE2   | 489     | 100   |
| KCNE3   | 450     | 100   |
| KCNH2   | 397.53  | 100   |
| KCNJ11  | 1454    | 100   |
| KCNJ2   | 1422    | 100   |
| KCNJ5   | 772.5   | 100   |
| KCNJ8   | 794     | 100   |
| KCNQ1   | 280.06  | 100   |
| KDM6A   | 284.27  | 100   |
| KIF11   | 295.71  | 100   |
| KLF14   | 773     | 100   |
| KLHL3   | 256.27  | 100   |
| KMT2D   | 1037.22 | 82.61 |
| KRAS    | 263.4   | 80    |
| LAMA4   | 269.95  | 100   |
| LCAT    | 707.67  | 100   |

|         |        |       |
|---------|--------|-------|
| LDB3    | 379.12 | 87.5  |
| LDLR    | 363.62 | 100   |
| LDLRAP1 | 373.25 | 75    |
| LIG4    | 2889   | 100   |
| LIPA    | 286.44 | 88.89 |
| LIPC    | 322.5  | 90    |
| LIPI    | 267.1  | 90    |
| LMF1    | 340    | 100   |
| LMNA    | 435.45 | 100   |
| LOX     | 306.29 | 85.71 |
| LPL     | 361.9  | 90    |
| LTBP2   | 340.91 | 96.97 |
| LYZ     | 245.25 | 100   |
| LZTFL1  | 271.64 | 90.91 |
| LZTR1   | 178.16 | 100   |
| MADD    | 379.18 | 92.86 |
| MAP2K1  | 284.82 | 100   |
| MAP2K2  | 297.9  | 90    |
| MFAP5   | 263    | 87.5  |
| MIB1    | 300.62 | 100   |
| MIB2    | 339.91 | 100   |
| MKKS    | 580.25 | 50    |
| MKS1    | 312.87 | 100   |
| MTHFR   | 402.09 | 90.91 |
| MTNR1B  | 626.5  | 100   |
| MTTP    | 268.94 | 100   |
| MYBPC3  | 349.09 | 95.65 |
| MYH11   | 333.06 | 91.67 |
| MYH6    | 382.9  | 100   |
| MYH7    | 419.59 | 100   |
| MYL2    | 252.5  | 100   |
| MYL3    | 356.75 | 100   |
| MYL4    | 211    | 100   |
| MYLK    | 318.87 | 93.55 |
| MYPN    | 298.67 | 95.24 |
| NAT2    | 991    | 100   |
| NEBL    | 251.29 | 93.55 |
| NEXN    | 387.1  | 90    |
| NKX2-5  | 810    | 100   |
| NOS1AP  | 313.9  | 100   |
| NOS3    | 407.63 | 94.74 |
| NOTCH1  | 458.39 | 89.29 |
| NOTCH2  | 380.15 | 93.94 |
| NPHP1   | 240.1  | 100   |
| NPPA    | 553    | 100   |
| NR3C2   | 505    | 100   |

|         |        |       |
|---------|--------|-------|
| NRAS    | 269.25 | 100   |
| NUP155  | 248.53 | 100   |
| OFD1    | 295.3  | 95    |
| OSMR    | 318.18 | 100   |
| PCSK9   | 501.7  | 90    |
| PITX2   | 444.6  | 80    |
| PKP2    | 347.92 | 92.31 |
| PLEKHM2 | 179.17 | 100   |
| PLN     | 253    | 100   |
| PLOD1   | 311.68 | 89.47 |
| PPARG   | 370    | 100   |
| PRC1    | 312.21 | 100   |
| PRDM16  | 303.88 | 100   |
| PRKAG2  | 286    | 100   |
| PRKG1   | 266.61 | 94.44 |
| PROX1   | 669    | 100   |
| PSEN1   | 296.6  | 100   |
| PSEN2   | 277.2  | 90    |
| PTPN11  | 311.29 | 100   |
| RAF1    | 336.69 | 100   |
| RANGRF  | 407.33 | 100   |
| RAP1A   | 196.5  | 100   |
| RAP1B   | 165.17 | 100   |
| RASA2   | 229.83 | 100   |
| RBM20   | 395.64 | 100   |
| RBPJ    | 387    | 45.45 |
| RIT1    | 338.75 | 100   |
| RRAS    | 446    | 100   |
| RTN1    | 386.89 | 100   |
| RYR2    | 272.37 | 97.14 |
| SAA1    | 308    | 100   |
| SAR1B   | 233.67 | 83.33 |
| SCAP    | 300.35 | 100   |
| SCN10A  | 352.73 | 96.15 |
| SCN1B   | 426.75 | 100   |
| SCN2B   | 329.5  | 75    |
| SCN3B   | 285.6  | 100   |
| SCN4B   | 273.4  | 100   |
| SCN5A   | 352.22 | 100   |
| SCNN1B  | 372    | 90.91 |
| SCNN1G  | 418.4  | 100   |
| SDCCAG8 | 304.88 | 100   |
| SDHA    | 370.31 | 100   |
| SEMA3E  | 296.12 | 70.59 |
| SGCD    | 253.88 | 100   |
| SHOC2   | 357.38 | 100   |

|          |        |       |
|----------|--------|-------|
| SKI      | 528.33 | 100   |
| SLC12A1  | 292.3  | 96.3  |
| SLC12A3  | 353.17 | 87.5  |
| SLC2A10  | 565.25 | 100   |
| SLC2A2   | 299.1  | 100   |
| SLC30A8  | 287.62 | 100   |
| SLMAP    | 238.47 | 100   |
| SMAD3    | 317.11 | 100   |
| SNTA1    | 388    | 100   |
| SOS1     | 309.36 | 100   |
| SOS2     | 333.14 | 90.91 |
| SPTA1    | 264.63 | 95.92 |
| TAF1A    | 270.5  | 100   |
| TAZ      | 398.5  | 100   |
| TBX5     | 350.38 | 100   |
| TCAP     | 384.5  | 100   |
| TCF7L2   | 295.83 | 100   |
| TGFB2    | 352.14 | 100   |
| TGFB3    | 291    | 100   |
| TGFBR1   | 306.62 | 100   |
| TGFBR2   | 338.25 | 87.5  |
| THADA    | 286.56 | 100   |
| TMEM199  | 280.2  | 100   |
| TMEM43   | 268.75 | 100   |
| TMPO     | 470.89 | 100   |
| TMPRSS6  | 317.18 | 100   |
| TNF      | 399.33 | 100   |
| TNNC1    | 205.2  | 100   |
| TNNI3    | 291.57 | 100   |
| TNNT2    | 283.29 | 78.57 |
| TNXB     | 597    | 100   |
| TP53INP1 | 332.75 | 100   |
| TPM1     | 281.71 | 100   |
| TRDN     | 216.25 | 80    |
| TRIM32   | 2060   | 100   |
| TRPM4    | 392.17 | 100   |
| TSPAN8   | 216.57 | 100   |
| TTC8     | 269    | 100   |
| TTN      | 930.77 | 94.08 |
| TTR      | 265.25 | 75    |
| TUBGCP3  | 295.27 | 90.91 |
| TXNRD2   | 310.81 | 87.5  |
| USF1     | 542.17 | 100   |
| VCL      | 276.05 | 100   |
| VPS13C   | 273.86 | 96.39 |
| WDPCP    | 292.76 | 82.35 |

|        |        |     |
|--------|--------|-----|
| WFS1   | 564.57 | 100 |
| WNK1   | 413.04 | 100 |
| WNK4   | 539.36 | 100 |
| ZBED3  | 207    | 100 |
| ZFAND6 | 296.8  | 100 |
| ZFPM2  | 571.38 | 100 |
